# Supplementary material for: Transcription factors TgbHLH95 and TgbZIP44 cotarget terpene biosynthesis gene TgGPPS in Torreya grandis nuts
Source: PubMed Central journal article supplement — Plant Physiol. 2023 Jul 3;193(2):1161–76. doi: 10.1093/plphys/kiad385 (PMC10517253; doi:10.1093/plphys/kiad385), 2023-07-03
Supplement: kiad385_supplementary_data.pdf [file kiad385_supplementary_data.pdf]

1 **Supplemental Data**

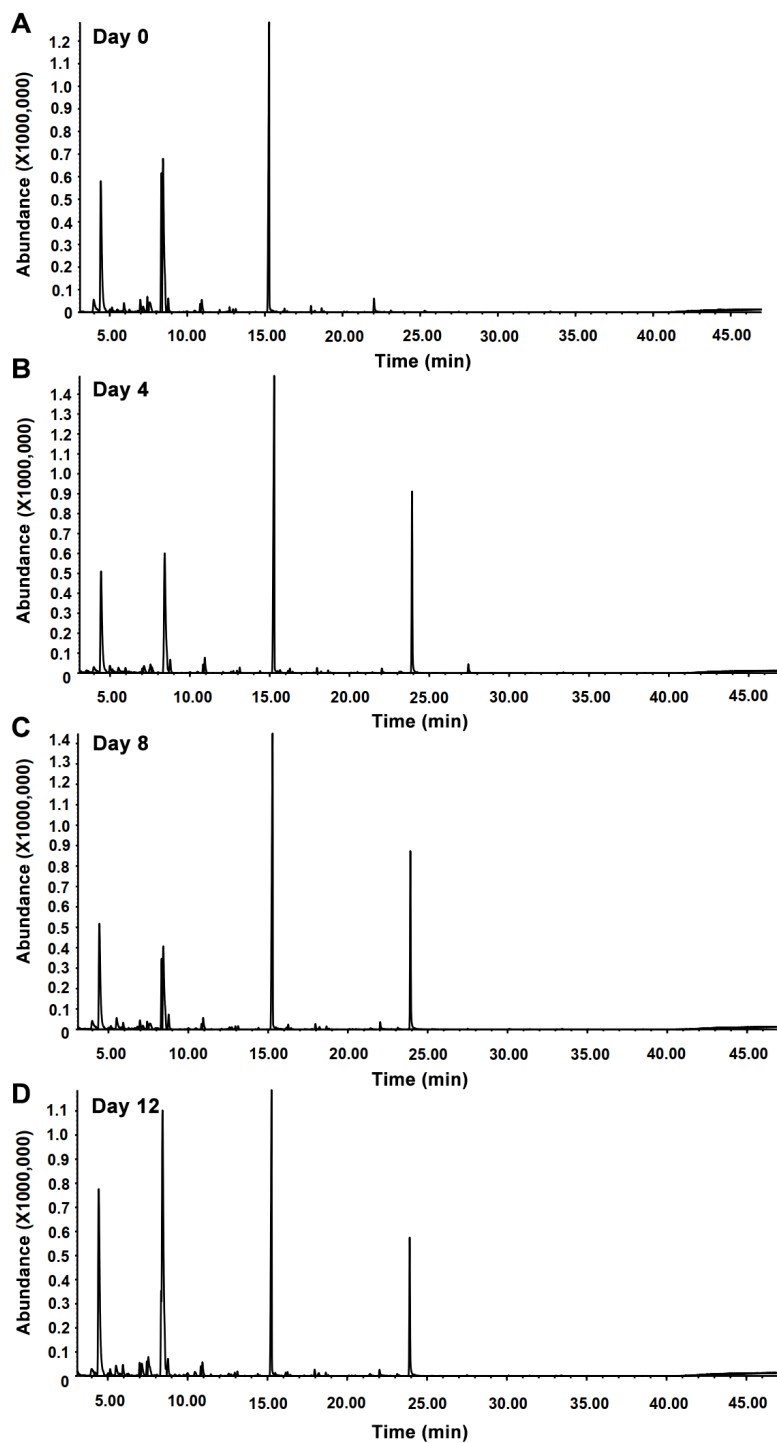

2

3 **Supplemental Figure S1.** Gas chromatography-mass spectrometry (GC-MS)  
4 chromatogram of volatiles in xiangfei (*Torreya grandis*) nuts determined on different  
5 days during the postharvest ripening stage. Note: A, day 0 of ripening time; B, day 4 of  
6 ripening time; C, day 8 of ripening time; D, day 12 of ripening time.



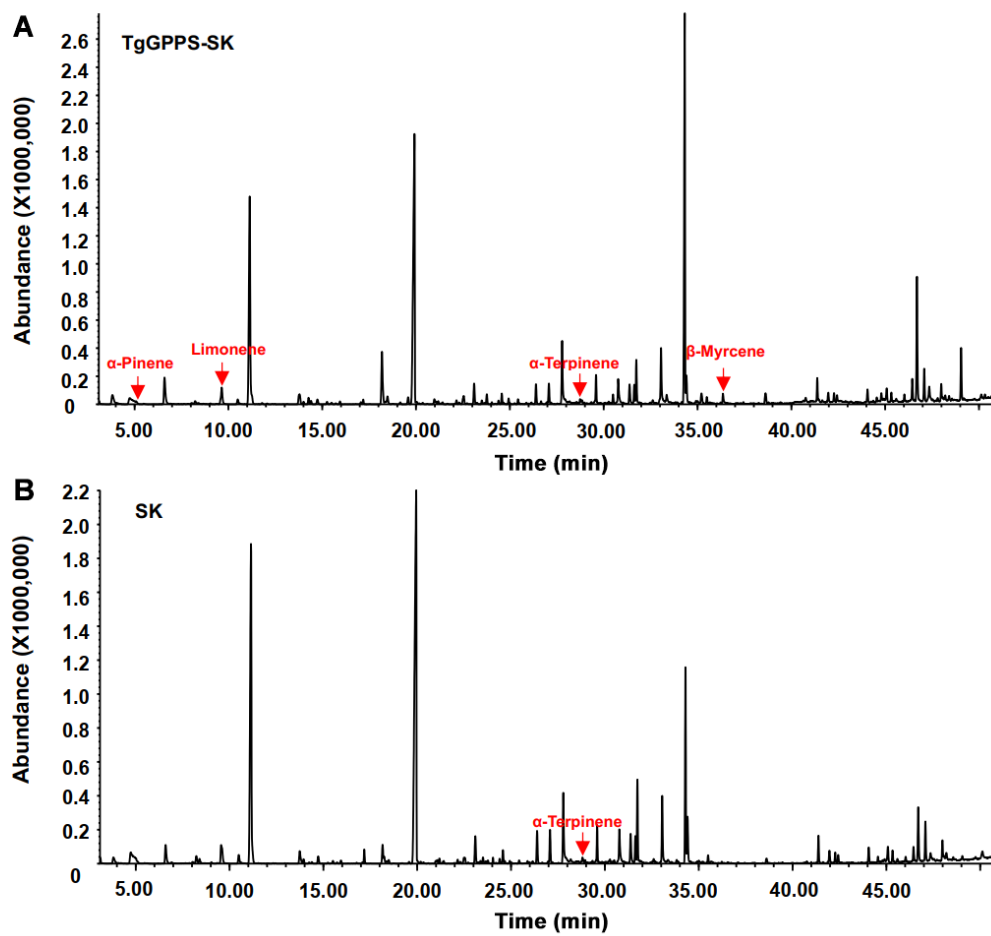

13

14 **Supplemental Figure S3.** GC-MS chromatogram of volatiles determined 7 days after  
 15 infiltration of tobacco (*Nicotiana tabacum*) leaves. A, GC-MS chromatogram of  
 16 volatiles after TgGPPS-SK infiltration. B, GC-MS chromatogram of volatiles after  
 17 empty vector SK infiltration.

18

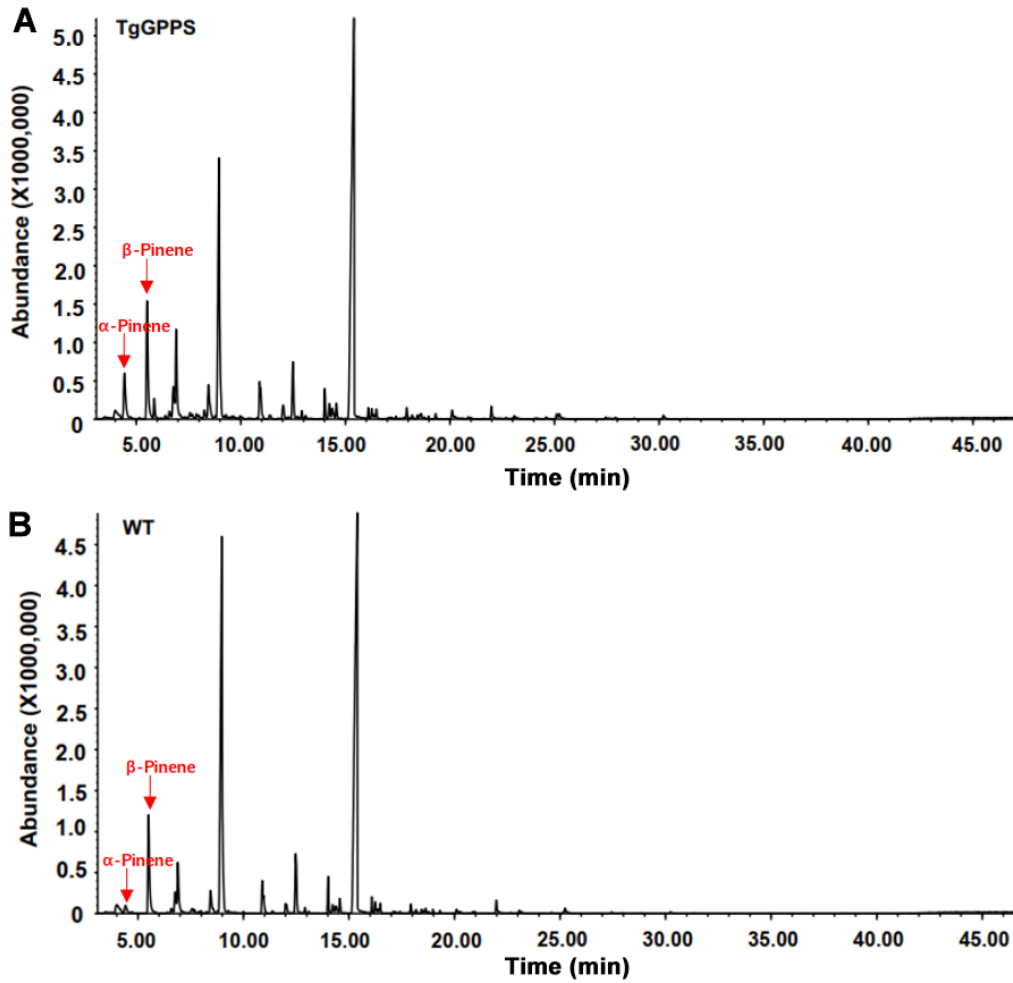

19

20 **Supplemental Figure S4.** GC-MS chromatogram of volatiles determined 7 days after  
 21 the breaker stage of tomato (*Solanum lycopersicum*, cv *MicroTom*) fruit. A, GC-MS  
 22 chromatogram of volatiles in *TgGPPS* overexpressing tomato fruit. B, GC-MS  
 23 chromatogram of volatiles in wild type (WT) tomato fruit.

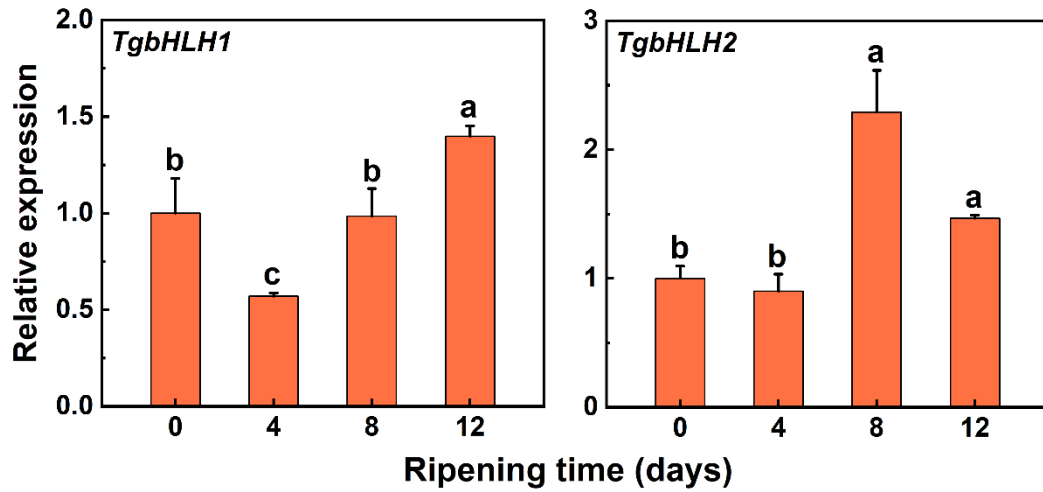

24

25 **Supplemental Figure S5.** Relative expression of *TgbHLH1* and *TgbHLH2* on days 0-  
26 12 during the postharvest ripening stage of xiangfei nuts. Bars represent the average +  
27 SE values obtained from three biological replicates. Different letters indicate significant  
28 differences ( $P < 0.05$ ) during the postharvest ripening stage by Duncan's multiple range  
29 test.

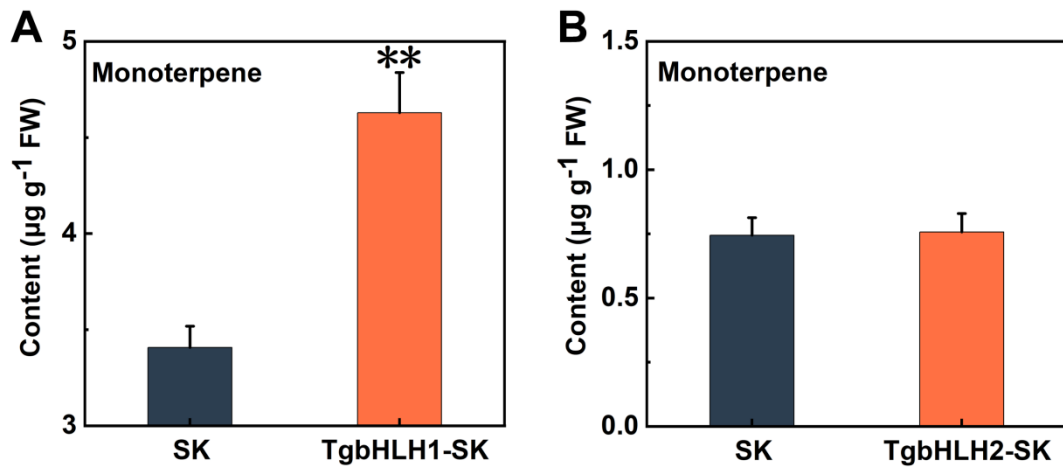

30

31 **Supplemental Figure S6.** Transient overexpression of *TgbHLHs* in tobacco (*Nicotiana*  
 32 *tabacum*) leaves. A, Transient overexpression of *TgbHLH1* showed an increase in total  
 33 monoterpene contents in tobacco leaves. B, Transient overexpression of *TgbHLH2*  
 34 showed no change in total monoterpene contents in tobacco leaves. The relative content  
 35 of monoterpenes after 7 days of infection was calculated according to the peak area of  
 36 the internal standard (2-octanol). SE values were obtained from three biological  
 37 replicates. Significant differences are indicated with asterisks using Students's test (\*\*  
 38  $P < 0.01$ ). FW, fresh weight.

39 **Supplemental Table S1.** Isolated and identified transcription factors involved in  
 40 regulating terpenes biosynthesis in different plant species.

| Type    | Species                     | Transcription factors | Targeted genes                                     |
|---------|-----------------------------|-----------------------|----------------------------------------------------|
| AP2/ERF | <i>Artemisia annua</i>      | AaERF1/2              | ADS, CYP71AV1                                      |
|         |                             | AaORA                 | ADS, CYP71AV1, DBR2,<br>AaERF1                     |
|         | <i>Citrus sinensis</i>      | CitAP2.10/CitERF76    | CsTPS1/CitTPS16                                    |
|         | <i>Zea mays</i>             | ZmEREB58              | ZmTPS10                                            |
| bHLH    | <i>Artemisia annua</i>      | AabHLH1               | ADS, CYP71AV1                                      |
|         | <i>Arabidopsis thaliana</i> | AtMYC2                | AtTPS1, AtTPS21                                    |
| MYB     | <i>Arabidopsis thaliana</i> | MYB21, MYB24          | AtTPS11, AtTPS21                                   |
|         | <i>Mentha spicata</i>       | MsMYB                 | MsGPPS.LSU                                         |
| NAC     | <i>Artemisia annua</i>      | AaNAC1                | ADS, DBR2, ALDH1                                   |
|         | <i>Actinidia arguta</i>     | NAC3                  | AcTPS1                                             |
| WRKY    | <i>Gossypium arboreum</i>   | GaWRKY1               | GaCAD1-A                                           |
|         | <i>Artemisia annua</i>      | AaWRKY1               | ADS                                                |
| bZIP    | <i>Artemisia annua</i>      | AabZIP1               | ADS, CYP71AV1                                      |
|         | <i>Oryza sativa</i>         | TGAP1                 | OsCPS4, OsKSL4, CYP99A2,<br>CYP99A3, OsMAS, OsDXS3 |
| Others  | <i>Mentha spicata</i>       | MsYABBY5              |                                                    |
|         | <i>Artemisia annua</i>      | EIN3                  | ADS, DBR2, CYP71AV1, AaORA                         |
|         | <i>Actinidia arguta</i>     | AaEIL1                | AaTPS1                                             |

42 **Supplemental Table S2.** The fragments per kilobase of exon per million mapped  
43 fragments (FPKM) value of all terpenoid synthesis genes from the 2-C-methyl-D-  
44 erythritol 4-phosphate (MEP) and mevalonate (MVA) pathways through annotation in  
45 the *T. grandis* transcriptome database. Among them, those marked in red had higher  
46 relative expression, and were selected as candidate genes from the heat map in Figure  
47 2. C4 indicates samples on day 4, C8 indicates samples on day 8, C12 indicates samples  
48 on day 12, CK-1, 2, 3 indicate control samples with three biological replicates.

| Gene                 | gene ID              | C4-AVE | C8-AVE | C12-AVE | CK-1   | CK-2    | CK-3    |
|----------------------|----------------------|--------|--------|---------|--------|---------|---------|
| TPS                  | cluster_contig41508  | 445.38 | 58.9   | 68.71   | 2855.9 | 2245.48 | 2653.26 |
|                      | cluster_contig107675 | 18.37  | 5.87   | 6.38    | 2.17   | 1.42    | 1.45    |
|                      | Unigene1071683       | 9.87   | 4.59   | 4.239   | 1.8    | 1.26    | 0.81    |
|                      | Unigene1138992       | 3.25   | 0.27   | 0.72    | 0.95   | 2.1     | 0.73    |
|                      | cluster_contig107677 | 2.88   | 0.79   | 0.90    | 1.22   | 1.87    | 1.41    |
|                      | Unigene1244643       | 4.08   | 1.57   | 1.12    | 1.08   | 1.09    | 0.91    |
|                      | Unigene1071684       | 4.74   | 3.11   | 2.89    | 1.6    | 1.08    | 1.45    |
|                      | cluster_contig28483  | 2.37   | 1.04   | 1.07    | 0.33   | 0.28    | 0.35    |
|                      | Unigene1169816       | 0.64   | 0.03   | 0.08    | 0.57   | 0.77    | 0.24    |
|                      | Unigene1169581       | 1.72   | 0.55   | 0.16    | 1.23   | 0.95    | 0.75    |
|                      | cluster_contig107673 | 0.48   | 0.41   | 0.11    | 0.27   | 0.67    | 0.45    |
|                      | cluster_contig28484  | 0.53   | 0.30   | 0.16    | 0.06   | 0.11    | 0.09    |
|                      | cluster_contig107678 | 0.80   | 0.55   | 0.40    | 0.28   | 0.22    | 0.18    |
|                      | cluster_contig110610 | 0.06   | 0.02   | 0.04    | 0      | 0.04    | 0.04    |
|                      | cluster_contig122705 | 0.33   | 0.55   | 1.74    | 0.79   | 0.30    | 0.49    |
|                      | cluster_contig107676 | 0.85   | 0.25   | 0.03    | 0      | 0       | 0.08    |
|                      | Unigene1030463       | 0.08   | 0.03   | 0       | 0      | 0       | 0       |
|                      | Unigene1052201       | 0.33   | 0.45   | 0.20    | 0.15   | 0.25    | 0.25    |
|                      | Unigene1055505       | 1.93   | 0      | 0.40    | 0      | 0       | 0       |
|                      | Unigene1111750       | 0.05   | 0      | 0       | 0.11   | 0.07    | 0.11    |
| Unigene1138993       | 0.53                 | 0.62   | 0.92   | 0.51    | 0.23   | 0.24    |         |
| cluster_contig107674 | 0.28                 | 0.20   | 0.20   | 0.15    | 0.14   | 0.34    |         |



|                      |                      |       |       |       |       |       |       |
|----------------------|----------------------|-------|-------|-------|-------|-------|-------|
| Unigene1169815       | 0.97                 | 0.38  | 0.04  | 0     | 0.03  | 0     |       |
| Unigene1216764       | 0                    | 0     | 0     | 0     | 0     | 0     |       |
| Unigene1223088       | 0.04                 | 0     | 0     | 0     | 0     | 0     |       |
| Unigene1229165       | 0.23                 | 0.32  | 0.34  | 0.24  | 0.17  | 0.15  |       |
| Unigene1230466       | 0                    | 0     | 0     | 0     | 0     | 0     |       |
| cluster_contig29037  | 0.04                 | 0.06  | 0.02  | 0.02  | 0     | 0.02  |       |
| cluster_contig47588  | 0.17                 | 0.01  | 0.01  | 0     | 0     | 0     |       |
| cluster_contig86232  | 0.05                 | 0.01  | 0     | 0     | 0.02  | 0.04  |       |
| cluster_contig106440 | 0                    | 0     | 0     | 0     | 0     | 0     |       |
| cluster_contig107672 | 0.04                 | 0.08  | 0     | 0     | 0.27  | 0.06  |       |
| Unigene1013840       | 0                    | 0     | 0     | 0     | 0     | 0     |       |
| Unigene1030127       | 0                    | 0     | 0     | 0     | 0     | 0     |       |
| Unigene1030462       | 3.40                 | 0.62  | 0     | 0     | 0     | 0     |       |
| Unigene1036911       | 0                    | 0     | 0     | 0     | 0     | 0     |       |
| <hr/>                |                      |       |       |       |       |       |       |
| <b>GPPS</b>          | cluster_contig30179  | 5.14  | 6.7   | 7.55  | 6.39  | 6.04  | 6.73  |
|                      | Unigene1220367       | 2.32  | 1.93  | 2.48  | 1.64  | 1.5   | 1.7   |
|                      | cluster_contig70933  | 7.14  | 5.17  | 6.97  | 13.33 | 12.44 | 13.57 |
|                      | cluster_contig111709 | 1.58  | 1.26  | 1.72  | 1.11  | 1.06  | 1.31  |
|                      | cluster_contig118960 | 2.23  | 1.99  | 2.73  | 1.48  | 1.54  | 1.64  |
|                      | Unigene1143830       | 0     | 0     | 0     |       |       |       |
|                      | cluster_contig89056  | 0.01  | 0     | 0.04  | 0     | 0     | 0.03  |
|                      | cluster_contig69789  | 0.01  | 0.17  | 0.03  | 0.06  | 0     | 0.06  |
| <hr/>                |                      |       |       |       |       |       |       |
|                      | Unigene1133129       | 68.23 | 75.68 | 87.52 | 56.52 | 59.87 | 59.68 |
|                      | cluster_contig81183  | 8.84  | 10.31 | 11.38 | 8.19  | 8.34  | 8.13  |
| <b>HDR</b>           | cluster_contig81184  | 15.10 | 17.28 | 19.15 | 12.35 | 12.84 | 12.59 |
|                      | cluster_contig81185  | 16.06 | 19.51 | 21.80 | 14.33 | 15.23 | 13.94 |
|                      | cluster_contig69353  | 0.01  | 0.04  | 0.05  | 0     | 0     | 0.02  |
| <hr/>                |                      |       |       |       |       |       |       |
|                      | Unigene1134183       | 30.82 | 30.34 | 24.01 | 19.02 | 19.57 | 20.52 |
| <b>HDS</b>           | cluster_contig81234  | 14.43 | 14.08 | 10.83 | 8.79  | 8.67  | 8.61  |
|                      | cluster_contig81235  | 10.08 | 9.52  | 7.85  | 5.48  | 6.21  | 6.2   |

|            |                      |        |        |        |        |        |        |
|------------|----------------------|--------|--------|--------|--------|--------|--------|
|            | cluster_contig104705 | 21.37  | 21.01  | 16.84  | 12.54  | 13.46  | 12.83  |
|            | Unigene1222427       | 17.11  | 16.87  | 13.40  | 10.75  | 11.27  | 10.8   |
|            | Unigene1167278       | 24.19  | 19.66  | 13.59  | 18.96  | 15.67  | 18.28  |
|            | cluster_contig93362  | 7.63   | 6.20   | 4.56   | 6.75   | 5.45   | 6.42   |
|            | Unigene1223957       | 6.60   | 6.36   | 3.66   | 5.14   | 4.81   | 5.53   |
|            | cluster_contig93371  | 1.68   | 2.36   | 1.10   | 1.62   | 1.24   | 1.72   |
|            | Unigene1124563       | 2.03   | 2.02   | 3.17   | 2.09   | 2.19   | 2.13   |
| <b>MDS</b> | cluster_contig91897  | 0.98   | 1.30   | 1.61   | 0.72   | 1.08   | 0.81   |
|            | cluster_contig114151 | 0.92   | 1.2    | 1.18   | 0.72   | 1.12   | 0.86   |
|            | Unigene1046800       | 0.06   | 0.16   | 0.08   | 0.05   | 0.02   | 0.04   |
|            | Unigene1056177       | 0      | 0      | 0      | 0      | 0      | 0      |
|            | Unigene1134643       | 0.50   | 0.82   | 0.99   | 0.64   | 0.8    | 0.88   |
|            | cluster_contig27809  | 0.04   | 0.16   | 0.04   | 0.01   | 0      | 0.03   |
|            | cluster_contig27810  | 0.01   | 0.18   | 0.07   | 0      | 0      | 0.07   |
|            | cluster_contig97353  | 581.04 | 614.43 | 560.70 | 718.65 | 781.59 | 758.55 |
| <b>CMK</b> | cluster_contig6554   | 10.17  | 11.11  | 9.23   | 0      | 0      | 0      |
|            | cluster_contig127572 | 0.11   | 0.33   | 0.04   | 0.05   | 0      | 0.09   |
|            | Unigene1052694       | 5.89   | 6.10   | 5.93   | 4.84   | 4.28   | 4.39   |
|            | Unigene1113803       | 2.35   | 2.85   | 2.60   | 2.2    | 1.6    | 1.54   |
| <b>MCT</b> | Unigene1139466       | 3.72   | 4.22   | 3.41   | 3.49   | 2.42   | 3.58   |
|            | Unigene1174511       | 4.74   | 5.68   | 4.65   | 4.25   | 3.61   | 3.73   |
|            | Unigene1222041       | 4.08   | 4.44   | 4.13   | 4.07   | 2.96   | 3      |
|            | Unigene1133829       | 15.48  | 15.03  | 18.21  | 11.42  | 11.49  | 11.69  |
|            | cluster_contig121684 | 8.03   | 7.92   | 9.86   | 6.17   | 6.34   | 6.16   |
|            | cluster_contig121687 | 7.98   | 7.73   | 9.21   | 5.61   | 5.81   | 5.76   |
| <b>DXR</b> | Unigene1225548       | 2.34   | 2.65   | 2.87   | 1.55   | 1.94   | 1.81   |
|            | cluster_contig121686 | 2.26   | 2.67   | 2.97   | 1.76   | 1.97   | 1.72   |
|            | Unigene1053578       | 0.04   | 0.15   | 0.09   | 0.01   | 0.05   | 0.07   |
|            | Unigene1063629       | 0.06   | 0.26   | 0.05   | 0.1    | 0.05   | 0      |
|            | cluster_contig37222  | 0.07   | 0.20   | 0.12   | 0.06   | 0.08   | 0.13   |

|            |                      |       |       |       |       |       |       |
|------------|----------------------|-------|-------|-------|-------|-------|-------|
|            | Unigene1131741       | 38.46 | 26.78 | 19.55 | 9.97  | 9.49  | 9.62  |
|            | cluster_contig132342 | 25.74 | 17.68 | 13.04 | 6.74  | 6.2   | 6.95  |
|            | cluster_contig113973 | 20.69 | 15.24 | 10.60 | 5.26  | 5.59  | 5.92  |
|            | Unigene1230286       | 20.31 | 15.05 | 10.41 | 5.28  | 5.67  | 5.26  |
|            | Unigene1129266       | 13.75 | 9.71  | 6.87  | 3.45  | 3.57  | 3.45  |
|            | cluster_contig132790 | 1.43  | 2.46  | 2.26  | 1.46  | 1.41  | 1.33  |
| <b>DXS</b> | cluster_contig102724 | 1.04  | 1.09  | 2.80  | 1.27  | 1.26  | 1.39  |
|            | Unigene1106877       | 0.97  | 0.8   | 2.35  | 1.1   | 1.2   | 0.91  |
|            | Unigene1187813       | 0.64  | 1.01  | 0.98  | 0.5   | 0.56  | 0.61  |
|            | cluster_contig77178  | 0.53  | 0.86  | 0.88  | 0.41  | 0.45  | 0.38  |
|            | cluster_contig18484  | 0.51  | 0.81  | 0.68  | 0.32  | 0.4   | 0.38  |
|            | cluster_contig14348  | 0.47  | 0.46  | 1.30  | 0.57  | 0.64  | 0.54  |
|            | cluster_contig8962   | 0     | 0     | 0.1   | 0     | 0     | 0     |
|            | cluster_contig45735  | 7.7   | 3.78  | 4.54  | 6.99  | 5.66  | 6.62  |
| <b>MVD</b> | cluster_contig14056  | 1.19  | 0.73  | 0.83  | 1.14  | 0.92  | 1.19  |
|            | Unigene1064877       | 0     | 0.057 | 0.06  | 0.05  | 0.05  | 0.03  |
|            | cluster_contig2092   | 18.03 | 24.76 | 20.22 | 31.81 | 35.8  | 34.76 |
|            | Unigene1173569       | 6.42  | 9.43  | 8.63  | 13.08 | 13.46 | 14.59 |
|            | Unigene1067755       | 6.07  | 8.22  | 7.09  | 10.11 | 10.64 | 10.84 |
| <b>PMK</b> | cluster_contig5009   | 5.2   | 8.07  | 6.87  | 9.69  | 9.13  | 9.28  |
|            | cluster_contig2627   | 2.83  | 4.29  | 3.54  | 5.26  | 5.83  | 5.55  |
|            | Unigene1193858       | 2.69  | 4.20  | 3.05  | 4.53  | 5.29  | 5.8   |
|            | cluster_contig47753  | 0.05  | 0.18  | 0.06  | 0.05  | 0.04  | 0     |
|            | Unigene1243203       | 4.66  | 5.12  | 5.43  | 7.26  | 6.45  | 7.22  |
|            | cluster_contig107843 | 1.17  | 1.31  | 0.96  | 1.03  | 1.05  | 1.05  |
| <b>MVK</b> | cluster_contig107844 | 1.15  | 1.54  | 1.33  | 2.08  | 1.74  | 1.9   |
|            | Unigene1055110       | 1.34  | 1.56  | 1.28  | 1.36  | 1.03  | 1.04  |
|            | Unigene1055113       | 0.2   | 0.27  | 0.12  | 0.35  | 0.11  | 0.57  |
|            | cluster_contig66474  | 52.35 | 13.26 | 1.27  | 2.37  | 2.69  | 2.1   |
|            | Unigene1027186       | 37.80 | 7.8   | 0.8   | 1.35  | 1.24  | 0.87  |

|             |                       |       |       |       |       |       |       |
|-------------|-----------------------|-------|-------|-------|-------|-------|-------|
| <b>HMGR</b> | cluster_contig66468   | 11.66 | 2.67  | 0.77  | 1.3   | 1.24  | 1.21  |
|             | Unigene1223684        | 14.34 | 3.19  | 0.55  | 0.72  | 0.63  | 0.7   |
|             | cluster_contig66471   | 25.34 | 6.23  | 0.80  | 1.05  | 0.9   | 0.83  |
|             | Unigene1193836        | 17.84 | 4.51  | 0.61  | 1.11  | 1.46  | 0.51  |
|             | cluster_contig66472   | 1.22  | 1.35  | 1.31  | 4.67  | 4.6   | 4.64  |
|             | cluster_contig112291  | 9.62  | 2.81  | 0.57  | 0.89  | 1.43  | 1.18  |
|             | Unigene1141625        | 1.08  | 1.40  | 1.20  | 5.71  | 5.51  | 6.09  |
|             | cluster_contig45995   | 0.19  | 0     | 0     | 0.04  | 0.07  | 0.03  |
|             | cluster_contig66467   | 0.22  | 0.28  | 0.22  | 0.54  | 0.32  | 0.32  |
|             | cluster_contig66469   | 0.22  | 0.04  | 0.30  | 0.55  | 0.81  | 0.58  |
|             | cluster_contig66473   | 1.12  | 0.35  | 0.36  | 0.15  | 0.26  | 0.18  |
|             | cluster_contig17085   | 0.51  | 0.29  | 0.32  | 0.49  | 0.31  | 0.32  |
|             | cluster_contig74862   | 0.58  | 0     | 0.03  | 0     | 0.08  | 0     |
|             | cluster_contig84896   | 4.89  | 0.99  | 0     | 0.05  | 0.09  | 0.05  |
|             | cluster_contig106108  | 0     | 0     | 0.03  | 0     | 0     | 0     |
|             | Unigene1026281        | 6.01  | 1.42  | 0     | 0     | 0.16  | 0     |
|             | Unigene1055278        | 0.96  | 0.05  | 0     | 0.14  | 0.4   | 0     |
|             | Unigene1055279        | 0.14  | 0     | 0     | 0     | 0     | 0     |
|             | Unigene1072160        | 0     | 0     | 0     | 0     | 0     | 0.71  |
|             | Unigene1072161        | 1.01  | 0.12  | 0     | 0     | 0.15  | 0     |
|             | Unigene1102935        | 0     | 0     | 0     | 0     | 0     | 0     |
|             | Unigene1120547        | 0.07  | 0.07  | 0.04  | 0.13  | 0     | 0     |
|             | Unigene1141624        | 1.01  | 0     | 0     | 0     | 0     | 0     |
|             | Unigene1220775        | 0.47  | 0.11  | 0     | 0     | 0     | 0     |
|             | Unigene1245029        | 0     | 0     | 2.58  | 0     | 0     | 0     |
|             | <b>Unigene1136698</b> | 17.93 | 20.77 | 21.14 | 13.31 | 13.25 | 13.89 |
|             | cluster_contig50852   | 19.86 | 8.03  | 4.47  | 5.71  | 9.4   | 5.66  |
| <b>HMGS</b> | cluster_contig43562   | 5.71  | 4.71  | 4.38  | 2.91  | 3.01  | 2.78  |
|             | cluster_contig99384   | 4.38  | 4.08  | 3.95  | 2.8   | 2.99  | 2.72  |
|             | cluster_contig122767  | 6.52  | 3.01  | 1.63  | 2.14  | 2.44  | 2.28  |

|       |                      |       |       |       |      |       |       |
|-------|----------------------|-------|-------|-------|------|-------|-------|
|       | Unigene1136697       | 3.46  | 1.55  | 0.89  | 1.34 | 1.47  | 1.41  |
|       | cluster_contig122766 | 1.08  | 0.44  | 0.29  | 0.32 | 0.4   | 0.38  |
|       | cluster_contig123082 | 0     | 0.11  | 0.07  | 0    | 0     | 0.01  |
|       | Unigene1043935       | 1.49  | 1.38  | 1.32  | 0.85 | 1.02  | 0.95  |
|       | Unigene1043936       | 0     | 0     | 0.03  | 0    | 0     | 0     |
|       | Unigene1235014       | 0     | 0     | 0     | 0    | 0     | 0     |
| <hr/> |                      |       |       |       |      |       |       |
|       | Unigene1132446       | 38.19 | 38.99 | 35.52 | 22.1 | 23.73 | 23.29 |
|       | cluster_contig67828  | 12.50 | 13.48 | 12.35 | 8.17 | 7.7   | 8.07  |
|       | cluster_contig125937 | 12.37 | 12.81 | 12.15 | 7.23 | 7.47  | 7.46  |
|       | Unigene1033526       | 1.10  | 1.36  | 1.21  | 0.66 | 0.72  | 0.65  |
| AACT  | Unigene1075230       | 0     | 0     | 0     | 0    | 0     | 0     |
|       | Unigene1150027       | 0     | 1.11  | 0     | 0    | 0     | 0     |
|       | Unigene1156688       | 0     | 0.30  | 0     | 0    | 0     | 0     |
|       | Unigene1199643       | 0     | 0     | 0     | 0    | 0     | 0     |
| <hr/> |                      |       |       |       |      |       |       |

50 **Supplemental Table S3.** Primers used for RT-qPCR.

| <b>Gene</b>     | <b>Forward (5'-3')</b> | <b>Reverse (5'-3')</b> |
|-----------------|------------------------|------------------------|
| <i>TgActin</i>  | TGGCATCTCTCAGCACATTCCA | TGCCAACATCTCAAGCAAGCAC |
| <i>TgGPPS</i>   | CGAGAGGATTCGTCGTTGTA   | ACCTCCCTAAGCCTCACTTA   |
| <i>TgbHLH1</i>  | TGAGGCAAATAGAGACGTGC   | GTCACGGAAGATTGCTGGAA   |
| <i>TgbHLH2</i>  | GTCGCTGTTTTTCAACCAGG   | GTTATATTCGCCGCCTCCAA   |
| <i>TgbHLH95</i> | TGGATCCAATGTTGTGGGAA   | TGCTGACTATTGCCCTTGGA   |
| <i>TgbZIP44</i> | ATGGGCAGGCCTACTGAAT    | GGCTGAGAAATGGAAGGCTG   |

51

| <b>Primer name</b>      | <b>Sequence (5'-3')</b>                            |
|-------------------------|----------------------------------------------------|
| <b>LUC: `</b>           |                                                    |
| TgGPPSpro-LUC-FP-BamHI  | CAGCCCGGGG <u>GATCCT</u> GTGATTGAAGAGCCCACAC       |
| TgGPPSpro-LUC-RP-NcoI   | TGGCGTCTT <u>CCATGG</u> CTTGCCTTCTGAAACAAAAA       |
| <b>pAbAi:</b>           |                                                    |
| TgGPPSpro-pAbAi-FP-SacI | AAGCTTGAATTC <u>GAGCTCT</u> GTGATTGAAGAGCCCACAC    |
| TgGPPSpro-pAbAi-RP-XhoI | AGCACATGCCT <u>CGAGCT</u> TGCCTTCTGAAACAAAAA       |
| <b>GFP:</b>             |                                                    |
| TgGPPS-GFP-FP-KpnI      | GTACCCGGGG <u>GATCC</u> ATGTCTTTGAGGTGCTCAGTAAGAAA |
| TgGPPS-GFP-RP-SalI      | GCTCACCAT <u>GTCGAC</u> CTTTTTCTAGTGGTACTTTTTTCAGT |
| TgbHLH95-GFP-FP-KpnI    | GAGCTC <u>GGTACC</u> ATGTCAACTTACAGAGGCTC          |
| TgbHLH95-GFP-RP-SalI    | GCTCACCAT <u>GTCGAC</u> TTCTTCATGACTAGTTA          |
| TgbZIP44-GFP-FP-KpnI    | GAGCTC <u>GGTACC</u> ATGGCTCCTCCATCAAATTT          |
| TgbZIP44-GFP-RP-SalI    | GCTCACCAT <u>GTCGAC</u> CTGATAAATTTCTTGAG          |
| <b>pGADT7:</b>          |                                                    |
| TgbHLH130-AD-FP-EcoRI   | GAGGCCAGT <u>GAAATTC</u> ATGTTAACAATCAAGGGCA       |
| TgbHLH130-AD-RP-BamHI   | GAGCTCGAT <u>GGATCC</u> TCAGAACCATGCATTGCAAA       |
| TgbHLH1-AD-FP-EcoRI     | GAGGCCAGT <u>GAAATTC</u> ATGACGGTGCTAACATTGCG      |
| TgbHLH1-AD-RP-BamHI     | CTCGAT <u>GGATCC</u> TTACTGCAACCTTTTCAGCTA         |
| TgbHLH2-AD-FP-EcoRI     | GAGGCCAGT <u>GAAATTC</u> ATGGAGTCTTACAAGGCGAT      |
| TgbHLH2-AD-RP-BamHI     | GAGCTCGAT <u>GGATCC</u> CTACATTGCCATCTGACTGC       |
| TgbHLH30-AD-FP-EcoRI    | GAGGCCAGT <u>GAAATTC</u> ATGGCTATGTTTACGGACA       |
| TgbHLH30-AD-RP-BamHI    | GAGCTCGAT <u>GGATCC</u> TTACCCTGAAACACTTCGA        |
| TgbHLH95-AD-FP-EcoRI    | GAGGCCAGT <u>GAAATTC</u> ATGTCAACTTACAGAGGCTC      |
| TgbHLH95-AD-RP-BamHI    | GAGCTCGAT <u>GGATCC</u> TCATTCTTCATGACTAGTTA       |
| TgbZIP44-AD-FP-EcoRI    | GAGGCCAGT <u>GAAATTC</u> ATGGCTCCTCCATCAAAT        |
| TgbZIP44-AD-RP-BamHI    | GAGCTCGAT <u>GGATCC</u> CTACTGATAAATTTCTTGA        |
| TgERF1B-AD-FP-EcoRI     | GAGGCCAGT <u>GAAATTC</u> ATGTGTCCGCTGTCTCTTCG      |
| TgERF1B-AD-RP-BamHI     | GAGCTCGAT <u>GGATCC</u> TCAAGATGGAGGAAGAGGGG       |
| TgERF1-AD-FP-EcoRI      | GAGGCCAGT <u>GAAATTC</u> ATGGCGACGGAGGAAGATGG      |
| TgERF1-AD-RP-BamHI      | GAGCTCGAT <u>GGATCC</u> TTATGCCCCGAATGTGGGACT      |
| TgERF2-AD-FP-EcoRI      | GAGGCCAGT <u>GAAATTC</u> ATGCTCCGGCGGGTAAATTG      |
| TgERF2-AD-RP-BamHI      | GAGCTCGAT <u>GGATCC</u> TTAATAAGTGCTGTCTTTTT       |

---

|                      |                                                |
|----------------------|------------------------------------------------|
| TgMADS16-AD-FP-EcoRI | GAGGCCAGT <u>GAAATTC</u> ATGTTTCATGGTGCTAGGTGT |
| TgMADS16-AD-RP-BamHI | GAGCTCGAT <u>GGATCC</u> TATCCCCAAATAGAAGATA    |
| TgMYB3-AD-FP-EcoRI   | GAGGCCAGT <u>GAAATTC</u> ATGCCATGGAGTGAGGAA    |
| TgMYB3-AD-RP-BamHI   | GAGCTCGAT <u>GGATCC</u> TACACCACTCTGATAAT      |
| TgRAV1-AD-FP-EcoRI   | GAGGCCAGT <u>GAAATTC</u> ATGGGATTGACTTTGGGTTT  |
| TgRAV1-AD-RP-BamHI   | GAGCTCGAT <u>GGATCC</u> TCAGCCGCTATTCGCTTTGT   |
| TgRAV3-AD-FP-EcoRI   | GAGGCCAGT <u>GAAATTC</u> ATGAAATTCAGGGCAAGAG   |
| TgRAV3-AD-RP-BamHI   | GAGCTCGAT <u>GGATCC</u> CAATTCTGCCCTCCGCTA     |
| TgGTE4-AD-FP-EcoRI   | GAGGCCAGT <u>GAAATTC</u> ATGGCTTCCGCTCTGCTGGC  |
| TgGTE4-AD-RP-BamHI   | GAGCTCGAT <u>GGATCC</u> TCAAAGAGAAAACCCAACCT   |

**SK:**

|                       |                                                |
|-----------------------|------------------------------------------------|
| TgbHLH130-SK-FP-BamHI | TAGAACTAGT <u>GGATCC</u> ATGTTTAAACAATCAAGGGCA |
| TgbHLH130-SK-RP-EcoRI | GCTTGATATCGAATTCCTCAGAACCATGCATTGCAAA          |
| TgbHLH1-SK-FP-BamHI   | TAGAACTAGT <u>GGATCC</u> ATGACGGTGCTAACATTGCG  |
| TgbHLH1-SK-RP-EcoRI   | GCTTGATATCGAATTCCTTACTGCAACCTTTCAGCTA          |
| TgbHLH2-SK-FP-BamHI   | TAGAACTAGT <u>GGATCC</u> ATGGAGTCTTACAAGGCGAT  |
| TgbHLH2-SK-RP-EcoRI   | GCTTGATATCGAATTCCTACATTGCCATCTGACTGC           |
| TgbHLH30-SK-FP-BamHI  | TAGAACTAGT <u>GGATCC</u> ATGGCTATGTTTACGGACA   |
| TgbHLH30-SK-RP-EcoRI  | GCTTGATATCGAATTCCTTACCCTGAAACACTTCGA           |
| TgbHLH95-SK-FP-BamHI  | TAGAACTAGT <u>GGATCC</u> ATGTCAACTTACAGAGGCTC  |
| TgbHLH95-SK-RP-EcoRI  | GCTTGATATCGAATTCCTCATTCTTCATGACTAGTTA          |
| TgbZIP44-SK-FP-BamHI  | TAGAACTAGT <u>GGATCC</u> ATGGCTCCTCCATCAAAT    |
| TgbZIP44-SK-RP-EcoRI  | GCTTGATATCGAATTCCTACTGATAAATTTCTTGA            |
| TgERF1B-SK-FP-BamHI   | TAGAACTAGT <u>GGATCC</u> ATGTGTCCGCTGTCTCTTCG  |
| TgERF1B-SK-RP-EcoRI   | GCTTGATATCGAATTCCTCAAGATGGAGGAAGAGGGG          |
| TgERF1-SK-FP-BamHI    | TAGAACTAGT <u>GGATCC</u> ATGGCGACGGAGGAAGATGG  |
| TgERF1-SK-RP-EcoRI    | GCTTGATATCGAATTCCTTATGCCCCGAATGTGGGACT         |
| TgERF2-SK-FP-BamHI    | TAGAACTAGT <u>GGATCC</u> ATGCTCCGGCGGGTAAATTG  |
| TgERF2-SK-RP-EcoRI    | GCTTGATATCGAATTCCTTAATAAGTGCTGTCTTTTT          |
| TgTGE4-SK-FP-BamHI    | TAGAACTAGT <u>GGATCC</u> ATGGCTTCCGCTCTGCTGGC  |
| TgTGE4-SK-RP-EcoRI    | GCTTGATATCGAATTCCTCAAAGAGAAAACCCAACCT          |
| TgMADS16-SK-FP-BamHI  | TAGAACTAGT <u>GGATCC</u> ATGTTTCATGGTGCTAGGTGT |
| TgMADS16-SK-RP-EcoRI  | GCTTGATATCGAATTCCTATCCCCAAATAGAAGATA           |
| TgMYB3-SK-FP-BamHI    | TAGAACTAGT <u>GGATCC</u> ATGCCATGGAGTGAGGAA    |
| TgMYB3-SK-RP-EcoRI    | GCTTGATATCGAATTCCTCACACCACTCTGATAAT            |

---



---

|                          |                                                    |
|--------------------------|----------------------------------------------------|
| TgRAV1-SK-FP-BamHI       | TAGAACTAGT <u>GGATCC</u> ATGGGATTGACTTTGGGTTT      |
| TgRAV1-SK-RP-EcoRI       | GCTTGATATCGAATTCTCAGCCGCTATTCGCTTTGT               |
| TgRAV3-SK-FP-BamHI       | TAGAACTAGT <u>GGATCC</u> ATGAAATTTTCAGGGCAAGAG     |
| TgRAV3-SK-RP-EcoRI       | GCTTGATATCGAATTCTCAATTCTGCCCTCCGCTA                |
| <b>BiFC:</b>             |                                                    |
| TgbHLH95-2YCN-FP-PacI    | TACGAACGATAGT <u>TAAATTA</u> ATATGTCAACTTACAGAGGCT |
| TgbHLH95-2YCN-RP-AscI    | TCCTCCACTAGTGGCGCGCCCTTCTTCATGACTA                 |
| TgbZIP44-2YCN-FP-PacI    | TACGAACGATAGT <u>TAAATTA</u> ATATGGCTCCTCCATCAAAT  |
| TgbZIP44-2YCN-RP-AscI    | TCCTCCACTAGTGGCGCGCCCTGATAAATTTCTTGA               |
| <b>LCI:</b>              |                                                    |
| TgbHLH95-cLUC-FP-KpnI    | TACGCGTCCCGGGGCGGT <u>ACC</u> ATGTCAACTTACAGAGGCT  |
| TgbHLH95-cLUC-RP-SalI    | ACGAAAGCTCTGCAGGT <u>CGACT</u> CATTCTTCATGACTAGTT  |
| TgbZIP44-cLUC-FP-KpnI    | TACGCGTCCCGGGGCGGT <u>ACC</u> ATGGCTCCTCCATCAAAT   |
| TgbZIP44-cLUC-RP-SalI    | ACGAAAGCTCTGCAGGT <u>CGACT</u> CTACTGATAAATTTCTTGA |
| TgbHLH95-nLUC-FP-KpnI    | ACGGGGGACGAGCTC <u>GGTACC</u> ATGTCAACTTACAGAGGCT  |
| TgbHLH95-nLUC-RP-SalI    | CGCGTACGAGATCTGGT <u>CGACT</u> TCTTCATGACTAGTTA    |
| TgbZIP44-nLUC-FP-KpnI    | ACGGGGGACGAGCTC <u>GGTACC</u> ATGGCTCCTCCATCAAAT   |
| TgbZIP44-nLUC-RP-SalI    | CGCGTACGAGATCTGGT <u>CGACT</u> CTGATAAATTTCTTGA    |
| <b>Co-IP:</b>            |                                                    |
| TgbHLH95-Flag-FP-BamHI   | GTACCCGGGGATCCATGTCAACTTACAGAGGC                   |
| TgbHLH95-Flag-RP-HindIII | GTGACTAGTA <u>AAGCTT</u> TCTTCATGACTAGTTA          |
| TgbZIP44-GFP2-FP-KpnI    | GTACAAGGGT <u>ACC</u> ATGGCTCCTCCATCAAAT           |
| TgbZIP44-GFP2-RP-BamHI   | TTCATCTAGAGGATCCCTGATAAATTTCTTGA                   |
| <b>GST pull-down:</b>    |                                                    |
| TgbHLH95-pGEX-FP-EcoRI   | CCTGGGATCCCCGGA <u>ATTC</u> ATGTCAACTTACAGAGGC     |
| TgbHLH95-pGEX-RP-NotI    | AGTCACGATGCGGCGCTTCTTCATGACTAGTTA                  |
| TgbZIP44-pET32a-FP-NcoI  | GACAAGGCCATGGATGGCTCCTCCATCAAAT                    |
| TgbZIP44-pET32a-RP-XhoI  | GGTGGTGCTCGAGCTGATAAATTTCTTGA                      |
| <b>EMSA:</b>             |                                                    |
| Probe-FP-biotin          | ATCATCCCATTTCGTATCCAACGTGAGACATACTCGGACCA          |
| Probe-RP-biotin          | TGGTCCGAGTATGTCTCACGTTGGATACGAATGGGATGAT           |
| Mutant-Probe-FP-biotin   | ATCATCCCATTTCGTATCCAAAAAGAGACATACTCGGACCA          |
| Mutant-Probe-RP-biotin   | TGGTCCGAGTATGTCTCTTTTGGATACGAATGGGATGAT            |

---

**Supplemental Table S5.** The full-length sequences of *TFs* and *TgGPPS*.

&gt;TgGPPS

ATGTCTTTGAGGTGCTCAGTAAGAAAAATATGTGAAAAAACAGTCTTTCAACGGAAGTTTT  
 TTTCTTCTGCAAAATTTGGGAGTGCCTTCAGACATACATACATTAATCGGATTTCTTTACTGC  
 CACCGACTCACTGCAGGGTTTTGGGGTATAATGGAAAATTTGGCTAGAAACAAATGCCTT  
 CCATGATTTTGGATTTCAAGCAGATCACAAAAGAGTTATTCCAAATGAGAAGCAAATTGAT  
 CCCTTTGCCCTTGTGGCTGATGAGCTGGGAGTTTTGGCTAATAGGCTGCGTTCAATGGTTGT  
 AACTGAGATTCTAAACTGGCAACAGCTGCGGAGTATTTCTTTAAGATGGGAGTTGAGGGT  
 AAAAGTTTTCGTCCCACGGTCTTATTGCTGATGGCATCATCTTTGACTATGGCAATACCTGA  
 AATGGCAGCTAACTCTGTCCATGAAGGATTTGCAAAGGAGTTACGAGTTCGACAACAGCG  
 CATTGCAGAGATTACAGAGATGATCCATGTGGCAAGTCTTCTTCATGATGATGTATTGGATG  
 ATGCAGAAACCCGCCGTGGTATCAGTTCTTTGAACTTTATGATGGGGAATAAGCTTGCTGTA  
 CTAGCTGGAGATTTCTTTCTTTCAAGGGCATCTGTGGCACTTGCTTCACTGAAAGACACAG  
 AGGTTGTTGAACTATTGTCAAAGGTATTGGAACATCTTGTCACTGGTGAAATAATGCAGAT  
 GACAACATCAGCAGAACAATGCTGTAGCATGGAATACTACATGCAAAAAACATTTTGCAAA  
 ACGGCATCATTGATGGCAAATAGCTGCAAGGCCATTGCTCTTCTTGCGGGTGAGCCAAGAG  
 AAGTTGCCACGCTTGCATATGATTATGGTCGGAATCTGGGGTTAGCATATCAGTTGGTTGAT  
 GATGTTCTTGACTTTACTGGCACAACAGCTTCCCTTGGCAAGGGGCCCTATCTGACATAC  
 GGCAGGGGATTGTGACAGCCCCTATGCTATTTGCTTTGGAGGAATTCCCAGAATTGCATGG  
 TGTAATTGGCAGAAGGTTCAAGAACCGAGGAGATGTTGACTATGCCCTTGAATTTCTTGGGA  
 AAAAGTCAAGGGATAAGGAAAACAAAGCAACTGGCAGCCGAACATGCAGATCGAGCAGC  
 ATCAGCAATTGATTCTTTCCAGCGTCAGATCTAGAAAATGTAAAAGTATGCAGGAAAGCA  
 TTGGTAGACCTCACTGAAAAAGTAACCACTAGAAAAAAGTAA

&gt;TgERF1

ATGGCGACGGAGGAAGATGGCCTCCGGGTGGGAGTCGTCGAGAGGGCGGAAGTTGGTGA  
 TGGCGTCGCTGCCGCGGAATTTGAGGGCGGCGGTGTCGTATGCGGTGGCGGCGTCTCTTC  
 ACCATTGAAAGTCCCCAGCCACACCCGCTGGTGTCTTCGTAATCTGGGCTCCCCACCGC  
 CCGTTGGGCTGCGGGACGACGCCCTTGTAACGCGACGACGGCAGCTTACCCGATTCCGTC  
 CTCTGAAACACCTTTTCTTTCTGTTGTTGATCTCCAACCTCCGCCGAGATGACGCTGATTCC  
 ACTGTCCATTCTTTGAGCCCCGCGGCAGGCGATTTGAGGGTAACCGCTTCGCCATTTTCA  
 GCTGGCGAGGAGGACAAATCTCCATCAGTCGTGCAGTCTCTTGAAGAATTCGAGAGCTTT  
 CGACCTTACCACGGCACAACAGCTGCCCAAGCTCAGTCCCACATTCCGGCA

&gt;TgbHLH2

ATGGAGTCTTACAAGGCGATGTTAGATGATGAGTGGTACATGGCGCCGCCACCGGGAGCA  
 GCCGCTGGTCAGGATAGCGTCTCATGGATGACCTCACGTATTCGTCGTTGGTTGCCGCTG  
 CTTCTCAGCCGCAAACGGAAGCTAGCGCTTCGACCATGTTTAGCCTGGATCCATCCCCGTCT  
 GCAATCGTTTCATGTCTTTTGTACCGAAAAGAAAAGCAGCAGCATGTGAACAACGGCTTGGC  
 TGGCTTGCTGGAGGCGGGTGGTTCTGGTGCAGTCAGTTTATGGCAATGTGGGATTTCTG  
 GGAAGTCTTCGAGCCTTGGTTCAAGTATAAGCTTTGGAGGAGCGGTGGGGCTGGAACCG  
 GGGGCTATGGTGAATGCAAATACATCGTCGCTGTTTTTCAACCAGGGTCACATGGGGGTAG  
 CCCCCTGCCCCATGCAGAACCCCTCGCCGCCCGTCCATGTTTTGTCTTCCGAGTCAACA  
 AGCTCAGATTTTGAAGTCCGCGCTGCAATTTGGAGGCGGCGAATATAACGGGCTGCTTGAA  
 GCGGACAGTGGGTTGAACGGCCTGAATATTGCGAGGGCCAACAGGTCTAAGGTTCTAGCC  
 CCGCCGACCTCGGTCTACGCCGACGTTGTTTTCAAAAACGAGCAGCATGCGACATTCCG  
 TCTTCTCCGCGGTGCCGCTGTTGCCCTTGCCCAAGTCATGCTTGTCAACCGCCCTGCGG  
 ACGAGGAGAGCCCCAGCAACCGTGGGAAGCGCAGGTCGCCCACGGGGACGACGATAAT  
 AAAGAGTCGTCCTCCCACCAGCTGGTTCAGCAGCAGCATATGGGAGAGGACAACATGGAC  
 GAGAGCGGTGGCGGGTCAAGGCTGCTTACGAGACGGACGACGCCAAGGCAGATCAAGG  
 AACGGGTAGAGCGCACGACGGCCACGGCCCCGGGCCCGGGACTGCAGATAAAG  
 GCAAAAAGAAGGGCTCCCCGGAAGAATCTCATGGCAGAGAGGAGGCGGAGAAAGAA  
 GCTCAACGACCGCCTTACATGCTTCCGTCAGTCCCCAAGATTTCAAAGATGGACAGG  
 GCGTCCATACTGGGCGATGCAATTGAGTATTTAAAGGAGCTGCTGCAGCGGATAAACGATC  
 TACATACGGAGTTGGAAGGGAGTGGGAGTGGAGAGAGGGGGGCTGTGTTGCCCTTCTAGCT  
 TGCCTTTCCAGCCTGTGACGCTTCCACGCCCGCTGATCCCTTGCCGTGTCAAGGAAGA  
 ATGCCCCATTCCATTGGCTGCTCACTCCGATGCTGATACACAGCCTGCGAGGGTAGAGGTG  
 AAGACAAGAGATGGAAGGGCTCTAAATATCCACATGTTTTGTGCAAGACGGCCAGGATTG  
 CTCCTGTCTACAATGAGAGCACTGGATGAGCTGGGGCTTGATGTCCAGCAAGCAGTCATCA

GCTGCTTCAATGGATTTGCCCTGGATGTTTTTCGAGCAGAGCAATGTAGAGGAGGGGAAGT  
GGCGCCAGAGGAGATAAAAGCAGTTCTTCTACATACTGCAAGCAGTCAGATGGCAATGTA  
G

>TgbHLH1

ATGACGGTGCTAACATTGCGAGAGGCCCTGAAAAGCCTCTGCTCTAAAAATGGCTGGAGT  
TACGCTGTTTTCTGGAAGCTTAAATCGCGTAACAGCATGATTCTGACGTGGGAAGATGGTC  
ACTATGAGTCAATACAACCACTAGGCATTTCAAAAACTTCTACGTTCAACAACCTGACTC  
ACTTCTCAAGGGCTGGGATACTGGAGGAAAGCTATATAATTACGGAGCCTGTGGTCAAGAT  
GGTTTTCTATTGAAGATCAAATTGGACTGCTTGTGGCTAAGATGTTGCATCAGAGACATCC  
GCTTGGAGAAGGCACCATCGGAAGTATTGCCTTTTCTGAAAAGCATCAATGGATCTTTACA  
GAGAACTTCTTAGCGGGAGGAATTCGCTTGGGTCACTTAATGCATCCTCAAGTTTTGAGT  
ATCCCGATGGTTGGA AAAATCAACTCGCAGCTGGAATAAAGACAATTGCAGTCATAGCGGT  
AGCGCCATATGGAGTGGTTCAACTCGGTCCAGACAGACTATTATAGAGGATTTAGAGCTT  
GTAAGACATATAAAGACCTTATTTGGAAGCGTTTACAATGTGTCAAGACCATTTTACATGA  
CCGTTC AAGAACTATTGAGTGGAAGGACTCATGAAACTCAGAGTCTAATGGGAATAAA  
ATGTGCAACATTGCTTCATGGGATACCTAATCAGCCAATGCTTAAAAATCTAAGTTCAAATG  
TTTTAAAAACAAGTGGTGACTCATTCTGTATTTGGAATGTCTAAAGGCCTCCAAGCAGA  
CGCTTCTGCAATACTTCTGTATGCAGTTCTAGTAGTTAGCTAAATCTTAAAGCCTCTATTC  
TCAATTACAGGAAAAAGGAATGCAGTTAAGCAGCCCTACACCTTACTAGCTCATGTAGCAG  
GAAACTTTATCAAGAGAAAACCAGGGCATTGCCTTCTGTATGCAGTTCTAGTAGTTAGCTA  
AATCTTTAAGCCAATTTTCTCAATTGCAGCAAAAAGGAATGCTGTAAAGCAACCCTACACC  
TTCACTTGCTCATGATCGGGAAACTTTATCAAGAGAAAACCAGGACATTGCCAGTCCAGG  
GTAATATACCCTTTCAGGGTATGCTACAAGCAAGTTCATGTAAGGACGACAATTGCCAGTC  
ATTATTCATTGGTTTCAAGTACAGGGAATAATAGACTAGCACTTATGGAACAACAACCTAGCAA  
AGGAAATGGGGTTACAAGGGAAAGTGCACCTTCTCTACCAATGGTCAGGGTACAGGCC  
AGCCAATTTTTCAAAAATAATACTACTATTTTCAAGAAAAGATCTCTTTTGAATGCTACTT  
TTGATGCAGTGAAATCAACCAATGCTGATATAATTTGCACTGTAATTTGAGTGAATCTGCC  
AGGGACGAAGGTATGCTTAAGACAGCTTTGTTTGAAGTCAAGATCCATCTCATATAAGCAACT  
TGAAACAAACAGAGATTCTAGCTTCTGTTCCAGCACTTCAGGATGTTTCATAGGAGACCTGA  
ACACTCTACAGCATCTTCAATGCCTCTACCGCATACTAACCGGTTTGAAGGAATGGACAGA  
AATCCTTTGGCTGAGTTGGATATCAGCCGCTCTGCTTGAAGGATTTTCATGCTTCTTCAAC  
AATAATCAGGCTCCTGTTTCTGCTGCTGGTCATCCATACCATGCTTCTTGGGGCATGACAT  
CAGGGCAGCTTGAAGTCTTTACAAGAACCAGTAAGCAATGATCTTATGCCTTCTTTAGG  
GGATGAATTTTTAATATCTGCAGCACTTGGACTAGGACCTCAGCCCTGGGACAAAGAAATC  
ACAACAAAAGATGTATCGTCTTTTTTCCAGGATGTTATGGTTGATAATTTGTATTAGCAAA  
AGAAAATTCTAAGGTTTCAAGAGGCTTCTTTAGGGAGGTTCTTCTGCTACAGACGAGTTT  
GCTCCTTATGCTTTTGTATGACCCTAAGTCTTTAACAAGTGGCCAGGAAAGCTCTATAAATTC  
AATTATCCTACGTGGAAGTGAAGTCTTTGATGTTTTGGGTCTGCTTTCAAACAACAC  
AAGACCAGGCCACATGGGATGACATATCATTGCCGATGAATTATGTAAGTGAATGGGAATTC  
ACATCTCATTCAATTTGGGGTATCTTCTGGTTACGCTGCCATCTGAAGTTGACTTGTACAG  
GAATTTTGATACATCCATGGGTAGGGGGCTTGAAGGAGGGCTTTTTTCAAGAGAGAAAGTCT  
GAACATCTTTTAGATGCTGTAGTGGCTAATATGCTTCCACCTGTCAACTACAGTGCAGATGA  
CAATACATCCTTAAGATCTTTTCTCAAGATTAAGTAGTGCACCTTCTTAGACAGCCCCT  
CAGTCAAGGCTGATCTTGTTCCTACTGGACCATTGAGTGGTTCCAAGCAATCCAAGTGTGC  
AGACCTTCTCATTGTAGAAATAACTCAGATATTA AAACTGCCCAAAGTTCTTTTACGTCTG  
GGTTTCAAGGAAAGGCATTTGCAAAAATGTTCTCCACCAATTCTGATTGAATACTCAGCT  
CAGTTCATGGATTGAAGATAGTAAGAGTGTGAAGTGTGAGAACCTGGGGCTTGCTCAAGC  
CAAAAAGACAGACGAGCCAGTCAAAGTGAAGTAGGAAGAGGGCTAAACCTGGTGAAAGTT  
CTAGACCAAGGCCTAAGGATAGGCAGCAGATTCAAGATCGTGTTAAAGAACTCAGAGAAA  
TTGTACCAATGGAGCCAAGTGCAGCATCGATGCTTTGTTGGAACGCACCATCAAGCACAT  
GCTATTCTTGCAGAGTGTACCAAGCATGCTGATAAATTAAGCAAAGCTGTGAGCCAAAG  
GTGCTTGATAAGGATAGGGGCTTGTTTGAAAAGGCCGCCTGGAAGGAGGTGCTAGCTGG  
GCATTGGAAGTGGGTGGTCAAAGCATGGGGTGCCTTATAATAGTGGAGAATATGAGTCAGC  
CTCGACAAATGCTTGTGGAGATGCTTGTGAGGAGCGGGGACTCTTTCTTGAATAGCAGA  
CATAATACGAGGATTGGGGCTTACCATTTTAAAGGGAGTCATGGAAGCTCGCAATGACAAG  
ATCTGGGCACGCTTTGCAGTTGAGGCAAATAGAGACGTGCATAGAGTGGAGATTTTGTGGT  
CCCTGATGCAATTGTTGCAACAGAACACAAAGAACAGTGTGACTGCAAGTAGTCAGCCTA

GTATAGTCACACATCAAGGCATTGATAGTGGTTCTCAAGCATTGAATGCATTCCAGCAATCT  
TCCGTGACTCCCATCCTTAGCATAGCTGAAAGGTTGCAGTAA

>TgbHLH95

ATGTCAACTTACAGAGGCTCTGAGGACCTCTATGAAATCCTTTCTGCCATTACCCTGTTTT  
AAACTTGAAACCTGAAGAGAAGCAACCAGTGATCAGTAAGAAAAGGAAATTGGATGGTG  
CAACTGCAATTTCGTCTTCACTGCATCAGTTTCCAGTGTCTCACAACAAACTGCTCTGA  
ACGCGAAATACACATATGGACTGAGAGGAGAAGGAGGAAGAAAATGAGTTATATGCTTAAT  
ACTCTACTGTCTCTCTACCAGGTCTCCATGGAAAGATAGACAAAACAAGGATTATTGACG  
AGGCTATCAATTATATCAAGACCCTCCAAGGTACCCTGAAAGATTTGCAAGCTGGAAAATC  
AGAAACAGAAGCATCTCTTAAGACAAGTTCATTGTCAAGGACGAAGTCAAAGGATTCTCA  
TCAAGTCTGTGATGTTCAAGTCCCTCGATCTTTCACAATGGTACCAAATTCCTGTATAAAGA  
TTCTTGATCCAATGTTGTGGGAAATCATGCCTTTACTACAATATGGGCTCCCCAAAAGACC  
GGATTTCTTCTGAATTTTCTCATCTTGGATGCTAATCAGTTGGAAAATTGTAAATTGCACC  
TTAAATACTGTTGGATGCAACACTTTATATACCCTTCATGTTATGTCCAAGGGCAATAGTCAG  
CAACCCGCGGCGATTGCAAAGGCCTTCAGATGCGCTATAAATTCATCATAACTAGTCATGA  
AGAATGA

>TgERF2

ATGCTCCGGCGGGTAAATTGCCCTCTCGACTAGGGAGGGATTGAAACCGGGACGTTGCT  
GTTGGAGTTTGAACCGTCCGTTGACTGATCCACGTCGTTGATCTTCATCGACTGCTGGAGC  
TCGTCTTGAAAGGTGTGCTTTCGGAGCATGTCGACAGTTTCTGCTTTGGAATGGCGAGCGA  
GGAAGACGGCCTCCGGGTGGGTTTCGTGAGAGGGGCGAAGTTGGTGACGGCATCGCTAC  
CCCGAATTTGTGGGCGGCGGTGTCGATGCCGTGGCGGCTTCTTCTGACTGTGCAAGGT  
TCCCAGCCACACCCGCTGGTGCCTCTCGTAAATCTGCGCGCCCCACCGGCCGTTGGGCTGC  
GGGACGACGCCCTTATAGTGCAGGACGGCAGCTTCCCCGTCTCCGTCCGCTTGAACCT  
CCTTGTCTGATTCCGCCTGCGGCAGGCGATCCGAAAGGATAACCGGTTCCGCATGCGC  
CTGAGGCGAGGAAGAGGAATCTCCTTTAGTCGTGCGGTATTGAGAATTCGAGAGCTTACG  
ACCTCTCCACGGCAACACAACCTGCCAAAGCTCAGTCCCGCATTCCCCTGAGAACGAAAC  
CACATAAAACCCAAAGTAAATCCCATGGGAAAAAAGACAGCACTTATTA

>TgRAV3

ATGAAATTTCAAGGCAAGAGTGGTTTGTGGATGGAATCGATGAGCTTGGTGTGCTGCCAG  
AAATGAGCTCAACGAGCTGTAGCGGAAAGGTGGGTTCCAGACCATAAACCTGCAAGACG  
ATGAAGTGGGCAGCGCCATGACGGAAGAATTGACGTCTTCTAACGGATCGAAAGGGCACC  
ACGAGGAGGCGATTTTCGCTTATGGATTGGAGATCAGGGGAGAAGAAAAGTGGACTGGAG  
AGAATGGGAAGCGGATTGAGCGTGGTATCGGCATCTCGCGGAGATTTTCGATGGAGGAGAG  
GAGTTGAGAAGGATTTCGATGTCAGATCAGGGGAAGCTGCCGTCGTCACAGTACAAGGGA  
GTGGTGCCGAGCCCAACGGGCGGTGGGCGCGCAGATTTACGAGAGGCACCAGCGCGT  
GTGGTTGGGTACGTTCAACCTGGAGGAAGATGCCGCCGGGCTACGACCGCGCGGCTCT  
CAAGTTCCGTGGGAGAGACGCCACCACTTCAGACCCGTCCACACGCCGACCCGG  
AGGCGCGGTTTCATGAGCCGGCACTCCAAGGTCGAAATCGTGGACATGCTGCGGAAGCACA  
CTTACGACGAAGAGCTGCACCACCTACCACCAACAAGAAAACGACGGCCATCAACAAC  
CGCGACCGTCAAGAAAACGAAGGCGCAACCGGATCCGAGCCGATAGACGGAACCTGCAAT  
TTCGGACGATTTCGGCTCTACTTCTAGTCTTGTCCAGTTCCACCTCGGGAGCATCTTTTCG  
ACAAGGCCGTGACGCCAGCGACGTGGGGAAGCTGAACCGGCTGGTGATTCCGAAGCAG  
CAAGCGGAGAAGCATTTCCTCTGGACGTGAATTCCAGCGAAAAGGGGCTGCTCTTGAAT  
TTGGAGGACGCCACAGGCAAGGCGTGGCGGTTCCGGTATTCGTAAGGACAGCAGCCAG  
AGCTACGTGCTGACCAAGGGTGGAGCCGTTTCGTGAAGGACAAGAACTGGAAGCCGG  
CGACATTGTTCTTTTACAGAGGGACGCCCTGACCCTACCAGCTTACATCACATGGCGG  
CGCAAGCCCTGCGGTCAGCCGCTCTCCAAGCAAAAACAAAATGGGGTTCCCCTACGGA  
TCAGCGTTAAACCCCTTCCATTAGCGCAACATGTGGCGGCTTACAATCCCCAGTGGATGC  
ACATCTTTTGGCCCAATTCCGAGTCGCCCTCGGTCACATGAAGAGCGCTGCCGTGTGGCC  
GCCTCACAGCCCAGCAATCCACTGTATTTCTCCGCGCTTGTAAACCTGACAGTTATCTCA  
ACCTAACAGGCCAGTGCAGCCGAGGAGCCACCAGGAAAGAGACGCTGTCGAGTTTC  
ATTCCCAGCAAAAGGCGAAGGAAGTGAGACTCTTCGGGGTGAATTTAGCGGAGGGGCA  
GAATTGA

>TgMADS16

ATGTTTCATGGTGCTAGGTGTCCTAACACTTTTACAACGATTTTATTTCTTATTAATTGTTT  
TATCTTTGGTGACGATTCCCTCCCTAGTGTTCCTCAAAGAGCAGCACTTTTGTCTACG

CCTCGCTCTTCATCAAAGCTGGGGCTGGCAAACCTCGTGTGCTTTCCCGTTGGCGAGAAAA  
TGATGAGAGCCACTTCAGCATCGCAGAGGACAGAGAGCTCGCTCGCCTTTTTCAACAGTC  
CCGCTTTGCGCTTGAGAAAGGTAACCTGGCGATTTATAGGGTTTTGTATCCTCTCGACCTGC  
ACCTTTCTCTCCCCATTCTTTTTCTATCTTCTATTTGGGGATAG

>TgRAV1

ATGGGATTGACTTTGGGTTTTATGTGGTTTCGTTCTCAGGGGAATGCGGGACTGAGCTTGG  
GCAGTTGTGTTGCCGTGGGAGAGGTCGTAAGCTCTGCGAATTCTGAATACCGCACGACTAA  
AGGAGATTTCTCTTCTCGCCTCAGGCGCATGGCGAACGGGTTATCCCTTTCCGGATCGCCT  
GCCGCAGGCGGAATCAGAAACAAGGAGGTTTTCAAGCGGACGGAGACGGGGAAGCTGCC  
GTCGTGCGACTATAAGGGCGTCGTCCCGCAGCCCAACGGCCGGTGGGGCGCGCAGATTTA  
CGAGAGGCATCAGCGGTGTGGCTGGGAACCTTCGACAGTCAAGAAGAAGCCGCCACGG  
CATACGACACCGCCGCCCAAATTCGCGGTAGCGATGCGGTACCAACTTCGCCCTCT  
CGACGAAGCCCACCCGGAGGCCGTCTTCTCGCTCGCCATTCCAAAGCAGAAACTGTGCA  
CATGCTCCGAAAGCACACCTTCCAAGACGAGCTCCAGCAGTCGATCAAGATCAACGACGT  
GGATCAGTCAACGGACGCTTCAAACAGCAACGTCCCGTTTTGAAATCCCTCCCTAGTCGA  
GAGGGCAACCTACCCGCCGGAGTACCTGTTGAAAAGACCGTGACGCCAGCGACGTGG  
GGAAGCTGAATCGCCTGGTGATCCCAAAGCAGCACACCGAGAAATCTTCCCAATCGACA  
TTGCCTCCAGCGGAAGGGTCTTGTGAGCTTTGAAGACGCCGCTGCCAAAACATGGC  
GGTTCAGGTATTCGACTGGAACAGCAGCCAGAGCTACGTCCTTACCAAGGGCTGGAGCC  
GCTACGTCAAGGAAATGGGCCCTCGCAGCAGGGGACGTCGTGACCTTCGAACGCAGCACC  
AGCGGCTCCGAGCAGCTTACATCAGCTTCCGTCGCAGCCCCTGTAATGTCGTCTTACCGG  
AGCCCGTAAACCGCGGCTCCAAGTCTTGTCTTCCCGACCTTTCTTTAGGCCCTT  
TACGGGCGACTGCCAGTCGACGCAAGGCATCTACTCGCCGTCGTGGTTCAGCATACAAA  
CTTTGGCCCCACTTCGCTTCCGGCAGATCGATCTGATTGTTCTCTCTATGGTTTAGACTTACC  
GGGTCTTTCCGGTGCATCGCCGTCAAGTGACGCGAAGTCCTCCTTGAATTTGTTAACCGC  
GGAAGAGAAAAATCTGTCATGCTGTTCCGAGCCGATATAAGTGAATCCTCCTCGTATGCATT  
AAATCTTTGCCATCGCGCAGGAAGAGCATGCAAAATTGATGAGGCGTCAAAGGCACAA  
AGCGAATAGCGGCTGA

>TgbHLH30

ATGGCTATGTTTACGGACAATTCTTCTCTGCATAAAAACCCTGGCCGAGCTTTTCGTTTACCA  
GCAATTGAGAAAAGAGCAAGCATTATCCTCAAGTGGATTTTCTCTACCAAATTCTGTAAC  
CGACTTACAGATTTCCAGCCAGTGCATTTCCGTTCTCTTATGGAAGCCAATCGAATTTGGC  
TTTTTCATGCTCAAACAACAATGTTCCCGAGATCCTGGATGGATCCAAGTTCTATGCGCAGC  
ATTTTGCTCAAACGGGGTCTTTGGTGCTGGATTGTAGCAGAGGGGAGCTTGTGAATGC  
TTCAAATTTGACTTTGAAAGAGATTTAGAAGCGAAGGCCCTTGCAGCATCAAAGAGTCA  
CAGTGAAGCCGAAAGAAGGCGTCGTGAAAGGATCAATTCTCACCTGGCAACATTGAAGAA  
CCTTCTTCCAGTATGACCAAGACAGACAAGGCTTCCCTACTTGCAGAAGCTATTAACCAA  
GTTAAGGACTTGAAGCGCCGGGCTGCTGAAATTGCTAAGACAAGTCTCTACCCACAGAT  
GTAGATGAACTGAGAGTGAAGAAGATGCAGCTGTTGAAGAAGGCAAGATTCTCATAAAG  
GCATCTCTGTGTTGCGATGATCGGCCTGATCTTATGTCTGATTTAATTCAAACATTTCAAACC  
CTTGGTTTTGAGAGCTGTAAGGCAGAAATTTCCACCTTGGCAGGCAGGGTAAAAAATGTG  
TTTCTTATGACTAATAGTGAAGAAAAATCAGAAGAAAATCGAGAAACGCTGTCAATCAACT  
GCATACAGGAAGCTTTAAGGGCGGTAATGGACAGGGCTGCTGCATCTGCCGAGTTGTCTGC  
AAGCTCAATCTCAAGCAAAGGCAGAGGATTCTACCATTTGATGGTCAAGTGTTCAGG  
GTAA

>TgbZIP44

ATGGCTCCTCCATCAAATTTGATTATGCCCAATTCATGATGGGCATGAGTGCTGGCACAAA  
TTCCACAACCTTCTTCTGTGGTCATGTGATCCAACCACAAAATTCAGGCTCTGAGGAAGAC  
CCACATCAAATCATTGATGAGAGGAAGCAGAAGAGAATGATATCCAATAGGGAATCTGCAA  
GGAGATCCAGGATGAGAAAGCAGCAGCATTTGGATGAGCTGAGAGCTGAGGCAGCTAATC  
TCAGAGCAGAAAACAATAGAATTCTCACAAGTTCAACTTTGTTTACACAATTACATGCA  
GCTGCAAGAGGAGAATTCTTCTGAGGTCACATGCAATGGATTTAAGCAACAAGCTGCA  
GTCTCTGAATATTGCAATGCAATGGGCAGGCCACTGAATGGCTGGATTTAGGTTTCATCTG  
ATGGTTTTCTGGATCCCACTCCACTGGATATCAAATCCTGGTACCTGCAGCCTTCCATTTCT  
AGCCCTTGACAGCTCAAGAAATTTATCAGTAG

>TgbHLH130

ATGTTTAAACAATCAAGGGCAAAGAATTAGCATTGGCTTAGACATGCCACCTGGACGTCTTG

GTCAATCTGATTCTAAAGGAATCCAAATGCAGTTCTCTCAGTACTCTATGGATTGAGAGAAA  
ATGTCTCCAATTCAGCAGCGAACAAATAATCTGGATTTTATGGATGTTGATTATAAACCCCTC  
GATTTGCAATGTATCCCACGTTGATGGAGTTATTCCATCTATGGAAGCAGGCTTGTCAAACA  
ATTTTCAGGGTTCATCAGGATTGTTGCGTTATCATTCTGCACCGAGCTCGTTTTTCTCCAGT  
CTAGAAGAAGAGGAAAATAATAACATCATATCACAGTATTTTTCTAATGATTCTCCCTTCC  
ATCACAATCTAATATTAACAATGCAGCAACATCAATCGAGTATATCAACCTCCCATCTTG  
GGGAGAACGAGCCAGCAAAGCATCGTGGAGAATGCAATGAATATTTAAAAAGGAATCTGC  
TGCAGCTTCCCTTCCCTAAAGAGAAGTGCAGGACATGCCGTTAGAGAAGATTTGGGCAAGC  
ACCATCATCTTGTGCAATCCTTGAGAACGGACCTGATGTATCCCATGAAACTTTTGGCACC  
TCCCAAATGTCATTGATGAGCCAAGCTCAAGCTTCTCACCCAGCTGGACGGCAGATAGACT  
CATACCAAACAACTCCGTTTCGTGTGATCCCCATGGAAGGGTGACTAATGCATCCTCCTC  
AACGTCCAAGAGTACCCTTATTAGACATAGTAGCTCACCAGCTGGGCTAATATCTAGATTAG  
TTACTGAGGCCAAAGGTGCATTTGAAAATGGTTATCTAGATGAAAAAATCAGGAGTACCAT  
GGGTTTGGAAAACCTGTGGGGATATCCTTCCCAAACAGAGTTCAAACCAAATGGG  
TTGTTTACGGCAGAATAGTTCTCCCCCTGGGCTATTATCTCAAATTTCCATGGATATGGGTGT  
ACCTGAAATTTGGTGACAGGCTGAACATGCCTATAGTTGGCTCTTCTGCAGAAAATCAAGCA  
GGGAGCAGTTCTGATGATGGTAGCTTAGGCAGCGGGAATGTACGACAAGGATACATTTCAA  
ATTTTCCAGTTGGGGCATGGGATGACACAGCAATCCGCTCTGGAAAACATGCTGGCATGCA  
AAATGGCACAACTTTGCTGCAAGAAAGCGTTCTAAAGAATTGGATGGGAATATGATGATG  
CAAGGTCTGCATAACACAGATGCCAGGTAGAGGCAGGAAATCGGGGTGCATTAATCAATC  
GCCATACAATTTGCCAAGATCTACATCTGCAGAACTTGAATGGAAGAACTCCTGCAAGA  
TTCTGTACCCTGCAAGGTTTCGTGCAAAGAGAGGCTGTGCAACACACCCACGAAGCATTGC  
TGAGAGAGTGCACGGACACGAATCAGTGAACGGATGAGGAAACTGCAGGAACTTGTGC  
CAAACAGTGACAAGCAAACACTACAAATATTGCTGACATGTTAGACGAGGCTGTTGAATATGT  
GAAGGCCCTTCAGAAACAGGTTTCAGGTGTGTTTCAGGCAACCCCTTTGCAATGCATGGTTC  
TGA

>TgMYB3

ATGCCATGGAGTGAGGAAGAGCACAGACTTTTCTTGGTTGGATTGGGAAAACCTGGGAAG  
GGTGACTGGAGAGGGATATCCAGAAGTTTTGTTACAAGCAGAACCCTACACAAGTAGCC  
AGCCATGCCAGAAATATTTCTGAGGCAGACCAGTCTCCACAAAAGAAAACGTCGGTCC  
AGCCTCTTCGATATGTGCCCTTATACTCAAATGTTACAAGCTTCTCTAGGAAACAGGATTC  
ACTAGAAAAGCAGCAAGATGTTTCCCCAAATCTATTTGGGGATTGAGAGTTATCAGTTGCA  
GCAGTTCCAAATTTATCCATGGGCATATCTGAAGATCAAGATGGAGAAAAGTATTGCCAATAC  
TCATCCACAGTCATTGTTGCCTTTATGGCCAGAAATGCAATGCACAGGCAGCAGTAATACT  
GATTGCATGGCAATGGAAAATGTTGGGGAATCAGATTCAGAACTAAGTCTAAGCATTGCAC  
CTCCTACACCATCTGCCTCAAATCAAAGACAGTATTATTGTGATAGTAACTAAATTTGGA  
GACTTCATCACCAGTGCTGCCATTATCAGAGTGGTGTGA

>TgERF1B

ATGTGTCCGCTGTCTCTTCGTAGGAGCAGCCGCCGCCGCGCAGCCTCCTCCGGAGGCGG  
AGGCGGAGGCTGAGGAGGAGGATTGGCGTCGACGATGTCGAGAGGGAAATTAAGCACCG  
CGCGAGTCCCAGTATGGCGAATGCGGCGCGGTTCGTACGCCAGCGCCGCTCCACCGCGG  
TATCGAACGTTCCCAGCCAGAGCCGAGCGCCTTGCCTCGCCGAGTCGCGTATCTCCGCCGC  
AAACTTCCCCACGGTCGCTGCCTCACCCCTCTGTACCTCGGCTGAGCCTCCGCCGCCGGA  
GGCGCCGCCGAGTTGCGCCACTGGATGAATCACTTTCCGCCGAGCGAGTTGCGGCACC  
GGTTGAATTACCTTCCCCGCTGCCTCGCCATTTCTTTAAACTGCCTCTGGTTCCAGTGGCT  
GAGCAGTGGGGCCCTCTCCACACATCGGGACGTCGCGGTTTCGAACCCCCGCCAACCGC  
CGCTGCCACCACACCCTGCAGATCCCAAACCTCCTCCATCCTATACAATTCCTGACCTAAT  
ATCGTTGCCGCTGCAGGTCCGGCGATCGAATCCCCGTAGACAAAAGACAACGCAGCCAT  
GCTTCTCTTTATAACAAAGCGCACAGGGTGGCGGACGCGGGAGGGAAGAAACAAATCCCT  
AAACGTCGCTTTAGCCTTAACCCTGGTTAAGCCACCCCACTCTCCCTCTTCTCCATCTT  
GA

>TgGTE4

ATGGCTCCGCTCTGCTGGCGAGTCGAGATGAGACGAGGGATCAGCAGCACCGCTGGGCA  
GAGAAAAGGTTTACATGAGGAAGGGTTCCGGCAAGACGGGCTCTTCAAGCCCCGCTTC  
GACTCCAGCAGGCGCGCAACGGCGCCGTGAGCTGGCCATGCCCCCTGGCGGCCATGAC  
AGGTTTCGAGGCGGCGGCGGCAATGGCGTCTGATGATTCTTCTAGCTTTAACAGGAAAT  
CAATAAACGTTAATCACGATGCGGCTGCCATGGATGTGGGGCTGCGTAACTGGAGACCTA

TGTAAC TTTTAATGTTAGTTCTTATTCTGCAGATAGGGTTAGGGAGCTGAAGAGAAAGTTGA  
GCCAAGAGTTAGAGCAAGTTAGGAGCCTGTACAGTAGGTTAGAGTCTAAGGAACTGCAGT  
TAAGGTGCAGTGGTGGTGGTGGTGGCGCGCGCTGGCGGCGGTTATTTCGAATGTCAATG  
CCAGTTACAGTGCTTCTCAGTTTTCCGGCAACGATGCGCGCAACTACGGTGGTAAAGAAGT  
AACCTCAGTTTTGGCGTCTAACCAAGTTTTAGGTTTAACCCATGGTCAACGGCCTCTGCCG  
CTGAGTATTGAGAGCAATATGACAGTGGGTGGAGACTGCGGATCCGCCAAGGAAAAACGG  
ACACCTAAAGCGAATCAGTATTACCGGAACTCGGAATTTGTTACCGGCAAGGATAAGATGC  
CGCTCCGGATAATAAAAGAACGGGCAGCCATAAAAGATCTGCGCAGGGGAAGTTAGACG  
GGAGGGAAGCGAAGAGGCCGGTTGTTGATCCTTTTCTGGCAAACAGCTGGGGGAAGCTT  
TGAAACAGTGCGGGAGTTTTGCTTAACAGGCTGATAAAGCATCGGCACGGGTGGGTTTTCA  
ATACTCCGGTGGATGTGGTTGGGCTAGGGCTTCATGACTACAATACGATTATCAAACATCCT  
ATGGATTTGGGTACTGTGAAATCGAAGCTTAGTGACAATAAGTACCGCTCGCCTGTTGATTT  
TGCGGCGGATATAAGGTTGACGTTTAATAACGCCATGACTTACAATCCGGAAGGACATGAT  
GTTTCATGTCATGGCTAAGCAGATGCTGCAGTTTTTTGAGGAGCGGTGGAAGCCGATCTATG  
AGAAATTCGAGGATGACAAGAGGAAATCTCAGTTTAATGCGTGGTTCGGACGATCGATTTGT  
CGGGGGTGTGGTCATAATGTGAAACAGCTGCCCATCAATGAAATTCAGAAGAAAAATCTG  
AAGAAAACAGAACCCATCCTTGGCCCGTGCCTCCTCCATTGAAGGCAGCGAAATCTAAG  
ACTAGCTCTGCGGTTTCGAACCCCTGCTCCAAGAAACCCAAGGCCAAAGACCCACATAAG  
CGAGAAATGAGCTACGAGGAGAAGCAGAACTGAGTGGCAACTTGCAGAGCCTGCCTCC  
GGAGAAGTTGGAGAACATAGTTTCAGATTATTA AAAAGCGGAATCCGGCATTGTGTCAGCA  
GGAGGATGAGATTGAGGTTGATATTGATTGTTTTGACACGGAACTCTCTGGGAACTTGAT  
AGGTTTGTCAACAACTGCAAGAAGAACATGAGCAAGAACAAGAAGAAAGCACCGAATGG  
GCTTGAACAGGTTCAAACAGCACCTGCAAACAACGAGGTTACAGCTAGAGAAAAGTTG  
GGTTTTCTCTTTGA
